# Supplementary material
Source: PubMed Central journal article supplement (PMC3219902)
Supplement: cei0166-0269-SD1.pdf [file cei0166-0269-SD1.pdf]

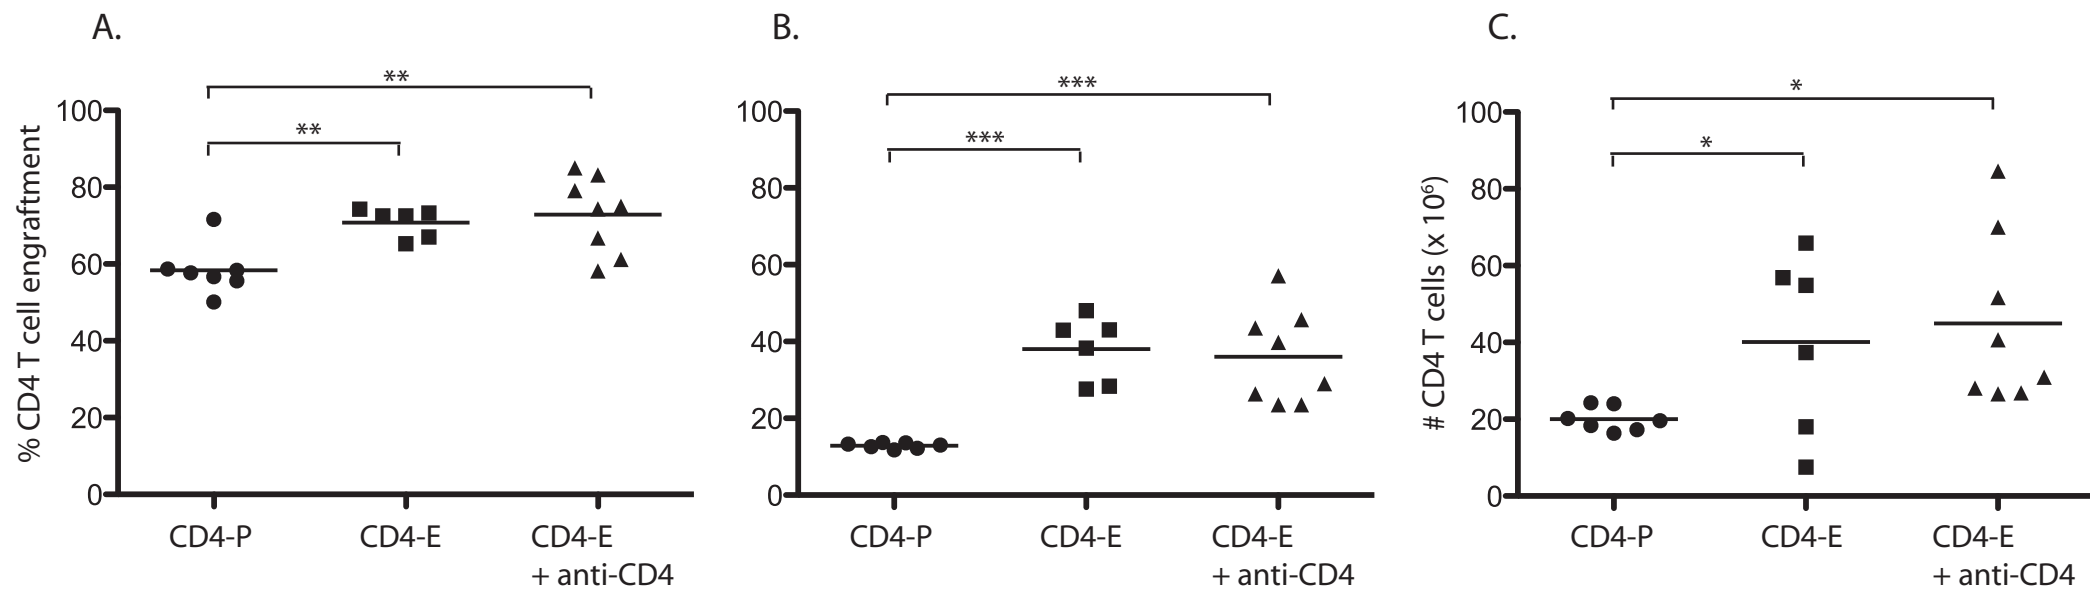

Supplemental Figure 1. Presence of anti-CD4 antibodies does not negatively affect human CD4 T cell engraftment in NSG mice. Human CD4 T cells were isolated from PBMC using micro-beads coupled to anti-CD4 or anti-CD8 antibodies. The CD4-P fraction was isolated by positive selection and therefore these cells are coated with anti-CD4 micro-beads. CD4-E cells were prepared by depleting CD8 T cells from the PBMC, resulting in a population of CD4 T cells not coated with micro-beads. The CD4-E+anti-CD4 population was obtained by combining CD4-P (micro-bead coated CD4 T cells) and the column flow through, which was further depleted of CD8 T cells resulting in a population of predominantly APC. The percentage of CD4 engraftment in the A) blood and B) spleen and C) the number of CD4 T cells in the spleen were determined at 2 weeks post-injection. \*,  $p < 0.05$ ; \*\*,  $p < 0.01$ ; \*\*\*,  $p < 0.001$ .
