# Supplementary material
Source: PubMed Central journal article supplement (PMC3219902)
Supplement: cei0166-0269-SD2.pdf [file cei0166-0269-SD2.pdf]

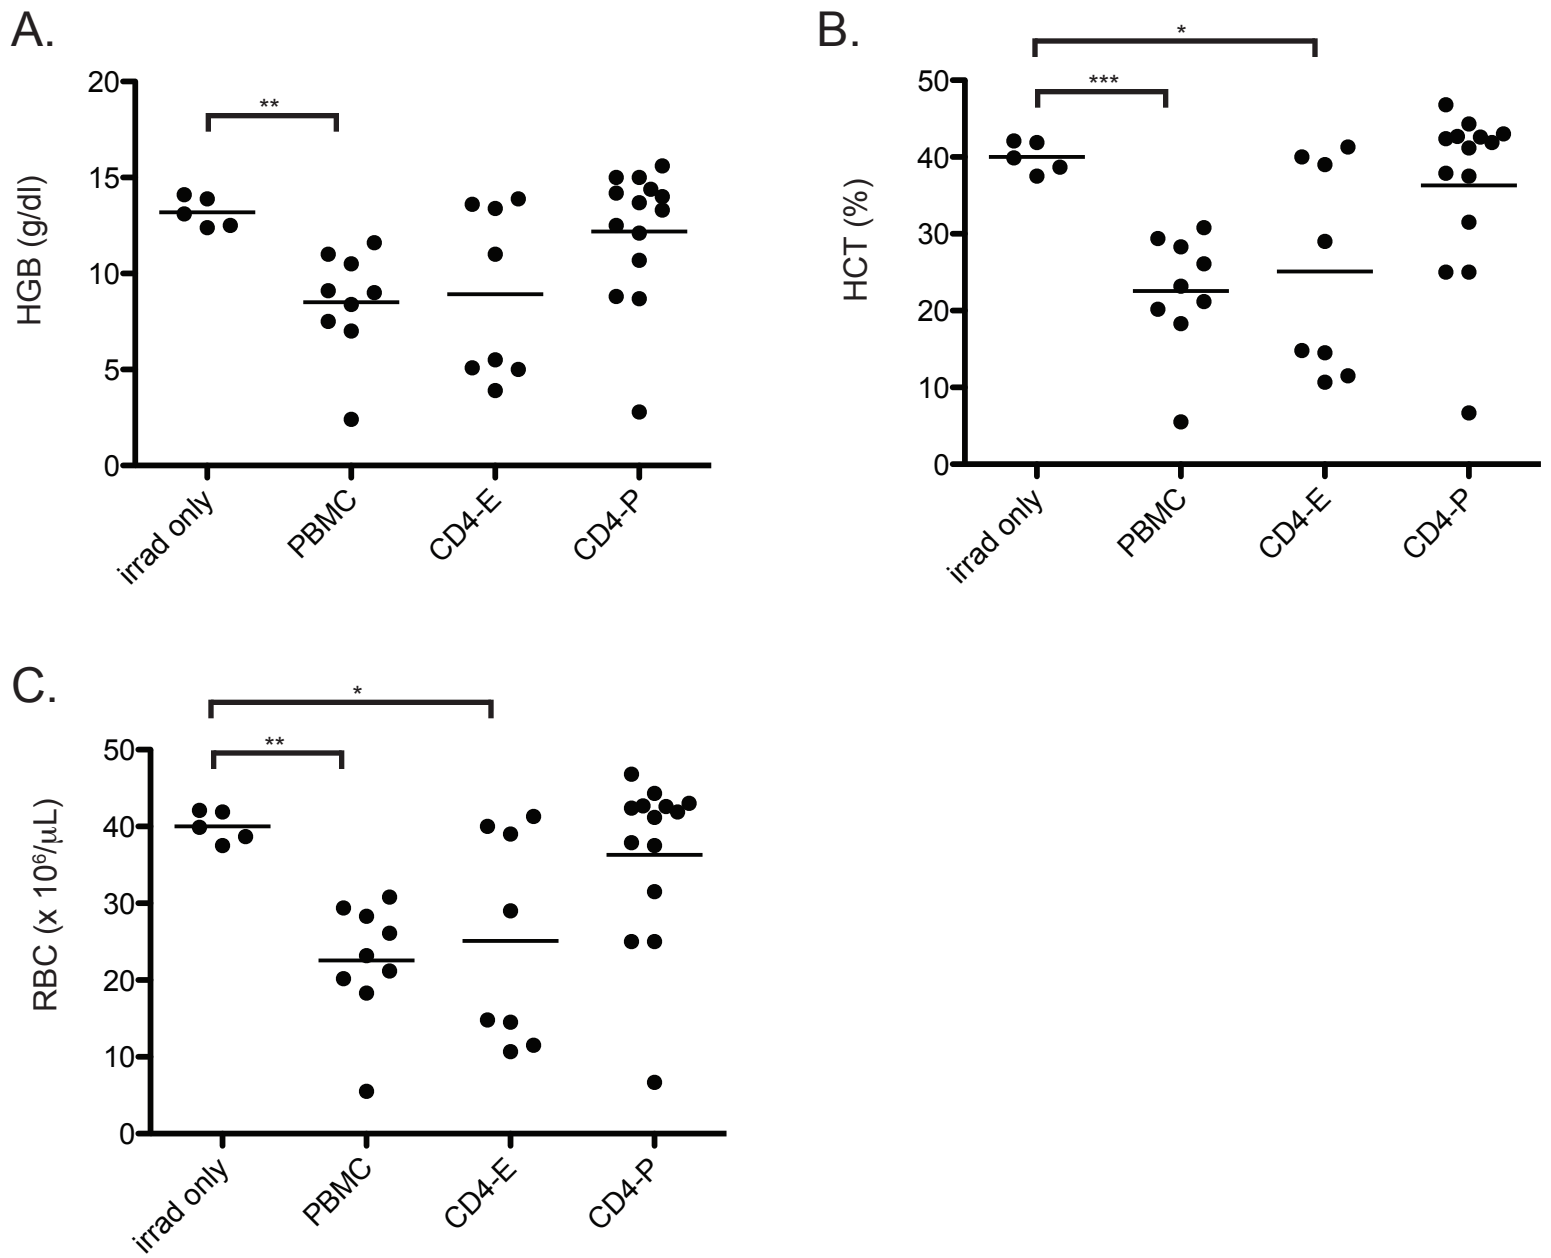

Supplemental Figure 2. Hematological analyses (A hemoglobin, B hematocrit, and C RBC count) at death or the end of the observation period of NSG mice either irradiated only or injected with the PBMC, CD4-E cells or CD4-P cells. \*,  $p < 0.05$ ; \*\*,  $p < 0.01$ ; \*\*\*,  $p < 0.001$ .
