# Supplementary material
Source: PubMed Central journal article supplement (PMC3219902)
Supplement: cei0166-0269-SD3.pdf [file cei0166-0269-SD3.pdf]

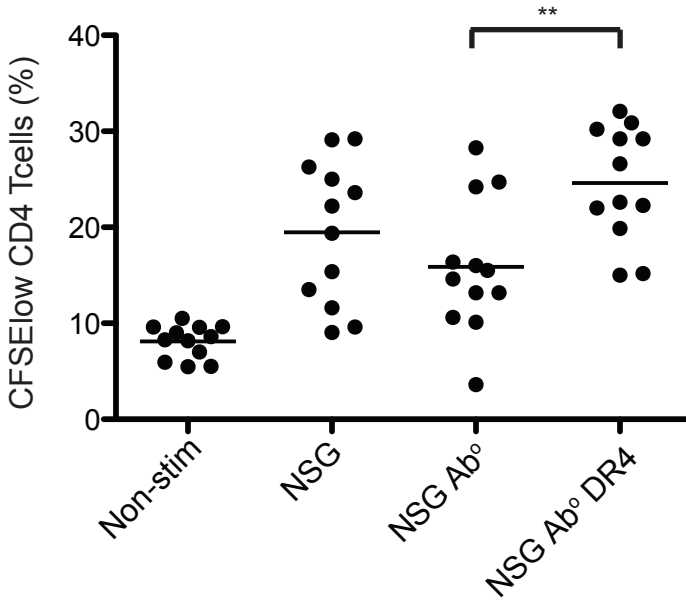

Supplemental Figure 3. In vitro proliferation of human CD4 T cells. A CFSE dilution assay was used to assess CD4 T cell proliferation in vitro, using splenocytes isolated from NSG, NSG-Abo or NSG-Abo DR4 mice as stimulator cells, as described in the Materials and Methods. The data are expressed as the % of CD4 T cells that were CFSE low. \*\*,  $p < 0.01$ .
